# Supplementary material for: Whole-Genome Sequencing of Six Mauritian Cynomolgus Macaques (Macaca fascicularis) Reveals a Genome-Wide Pattern of Polymorphisms under Extreme Population Bottleneck
Source: PubMed Central journal article supplement — Genome Biol Evol. 2015 Mar 22;7(3):821–30. doi: 10.1093/gbe/evv033 (PMC5322541; doi:10.1093/gbe/evv033), 2015-03-22
Supplement: supp_evv033_FigureS1.pdf [file supp_evv033_FigureS1.pdf]

## Supplementary Figure 1

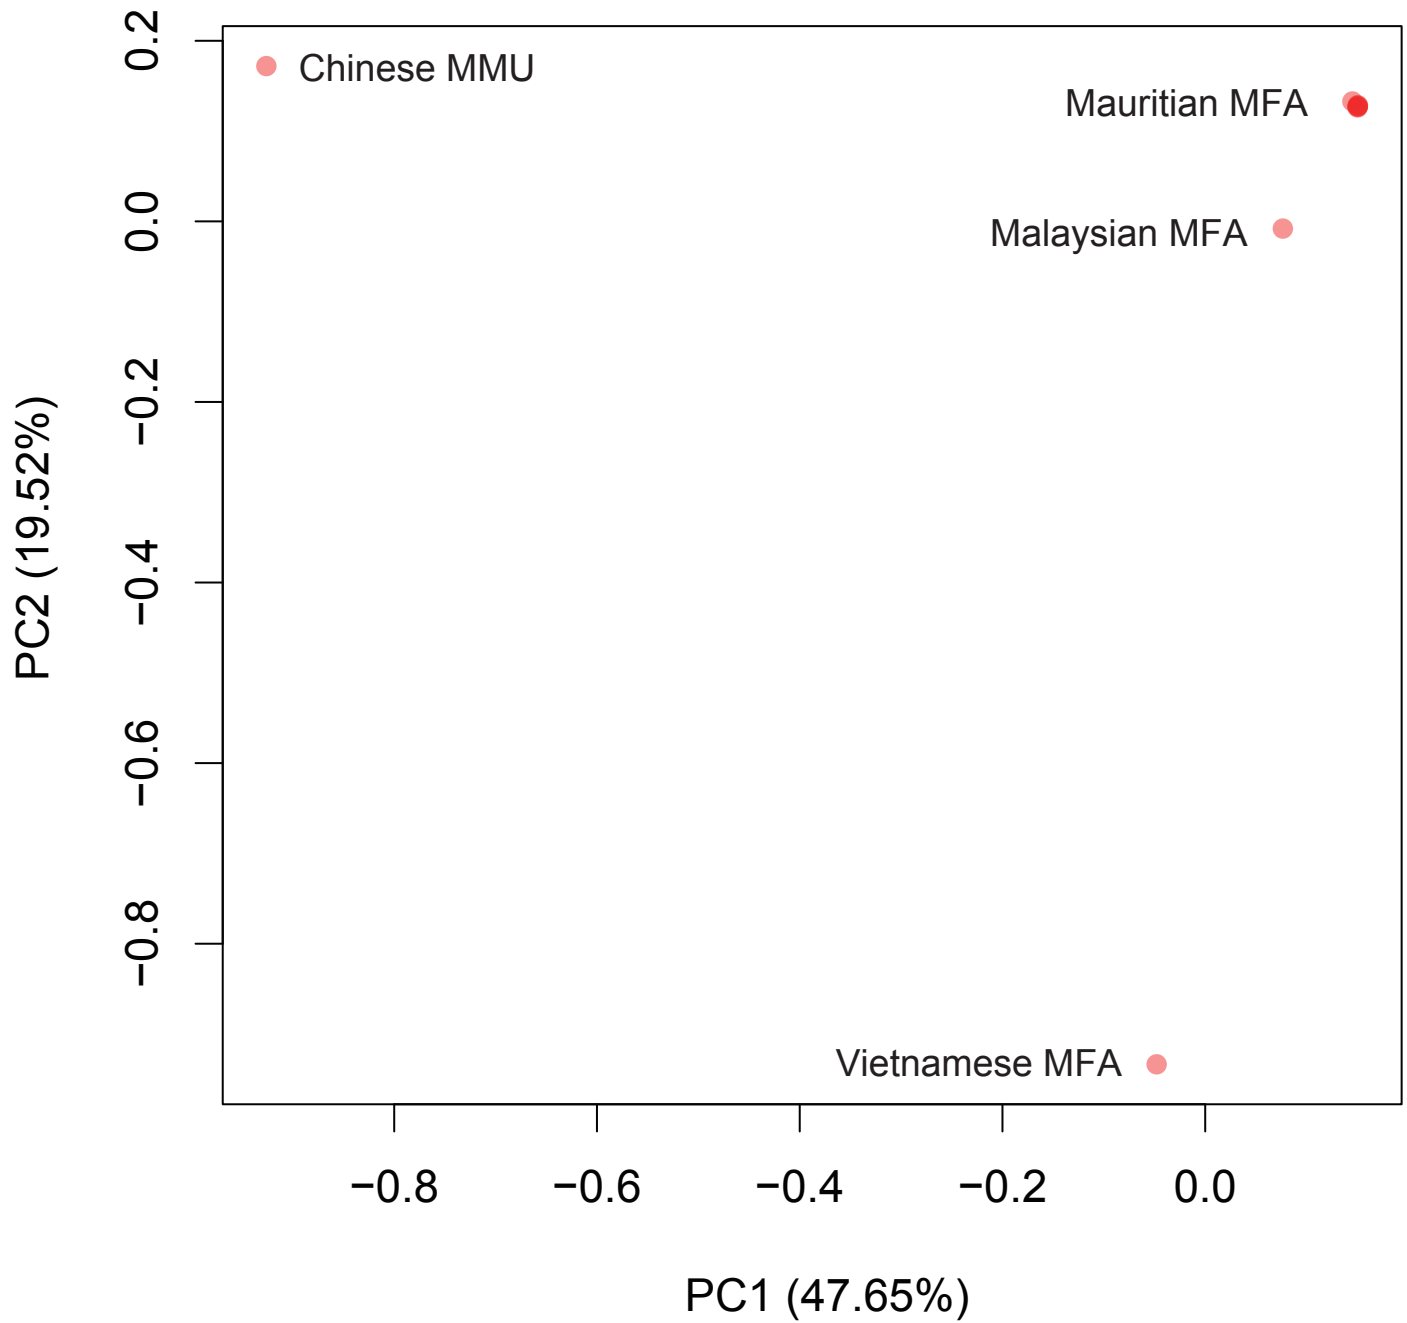

PCA plot of the nine macaque individuals. The individual ID is given beside each data point. The  $x$ - and  $y$ -axes represent the first and second principal component, respectively. MFA and MMU designate *Macaca fascicularis* and *M. mulatta*, respectively.
