# Supplementary material for: Whole-Genome Sequencing of Six Mauritian Cynomolgus Macaques (Macaca fascicularis) Reveals a Genome-Wide Pattern of Polymorphisms under Extreme Population Bottleneck
Source: PubMed Central journal article supplement — Genome Biol Evol. 2015 Mar 22;7(3):821–30. doi: 10.1093/gbe/evv033 (PMC5322541; doi:10.1093/gbe/evv033), 2015-03-22
Supplement: supp_evv033_FigureS2.pdf [file supp_evv033_FigureS2.pdf]

## Supplementary Figure 2

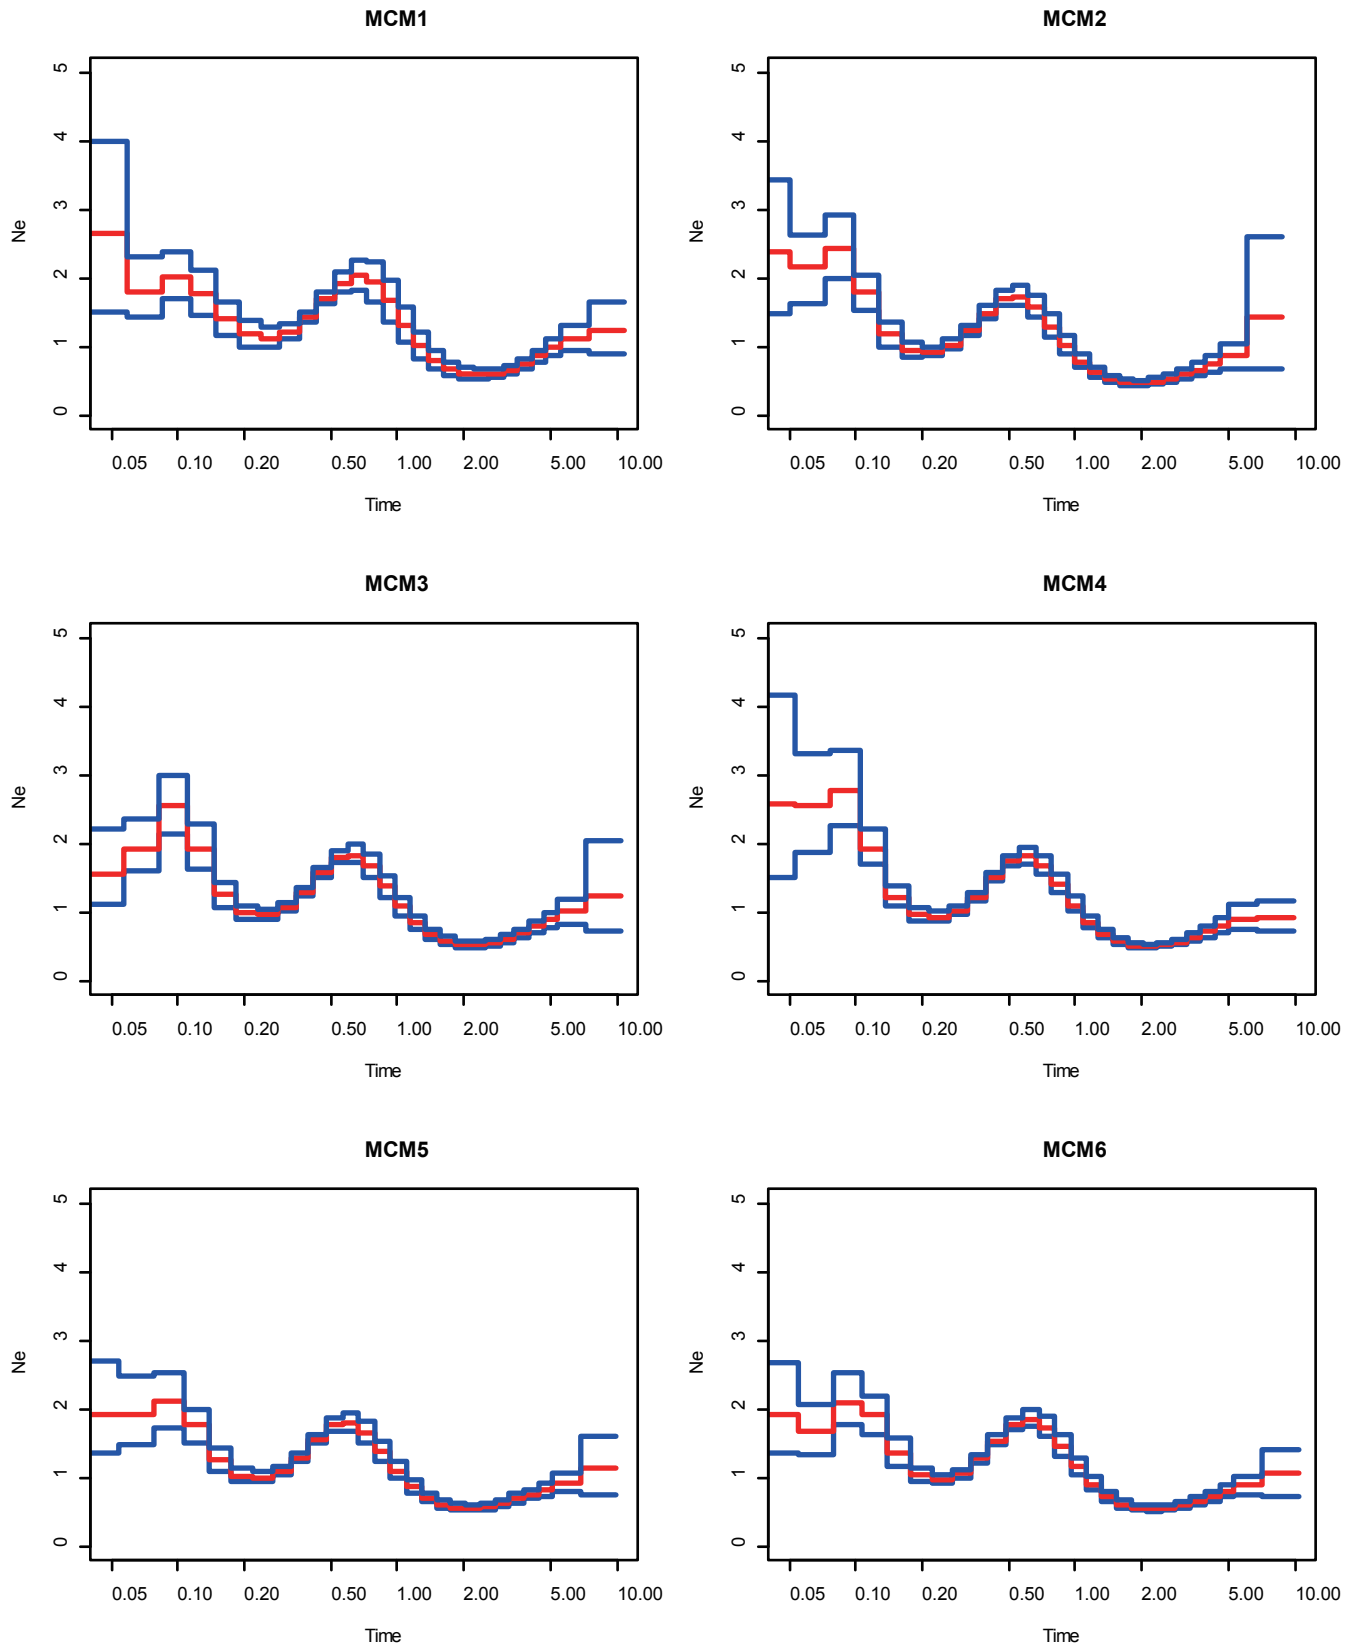

Confidence interval of past population sizes using bootstrap resampling. The block size of 10Mb was used for the resampling of genome sequences. The number of iteration was 100. The blue and red lines represent 90% confidence intervals and averages, respectively.
